# Supplementary material for: Onchidium struma polysaccharides exhibit hypoglycemic activity and modulate the gut microbiota in mice with type 2 diabetes mellitus
Source: Royal Society of Chemistry journal article supplement (doi:10.1039/d2fo02450k), 2023-01-01
Supplement: d2fo02450k1.xlsx [file d2fo02450k1.xlsx]

## Sheet: serum-GSP
Normal	Model	OsPs	MH
3.48732	3.81831	3.51803	2.99
3.5493	4.25915	3.02999	2.9853
3.07465	4.27465	2.79714	3.14641
3.22535	5.02817	3.43336	2.93473
3.60845	4.36197	3.32752	3.43806
2.97183	4.22254	3.20286	3.33575
3.37465	4.80986	2.55135	3.35927
3.53099	4.23944	3.54508	3.80615
3.11701	4.69404	3.38985	3.62387
2.90298	3.85319	3.40749	2.95943
2.93826	4.2648
3.5639	2.79949
2.72658	3.88142
3.16405
3.10643
3.08996

## Sheet: serumTC
Normal	Model	OsPs	MH
4.02325	9.53085	3.54621	4.87225
2.90437	8.32516	3.00396	4.66774
3.80141	16.6235	4.19455	4.67977
2.73075	17.3276	3.13658	3.46471
3.47989	11.0034	3.85564	3.98201
3.35128	8.55987	3.30161	5.69031
4.94922	15.1124	3.64641	3.66321
2.07164	11.6529	3.32813	5.8076
4.18276	8.81248	4.336	5.6061
3.01575	10.8636	4.26233	3.63314
3.1631	9.23684
3.29572	7.59242
3.51969	13.3921
3.65819
5.49712
3.62873

## Sheet: serumTG
Normal	Model	OsPs	MH
0.676754	1.08502	1.69953	0.966868
0.729345	0.849749	1.98	1.24019
0.581261	1.91955	3.62277	2.10307
0.802694	2.52434	2.25046	2.97024
0.214513	0.655995	2.37496	2.20181
0.759792	1.22342	3.1806	1.7582
1.12931	0.999216	1.12857	2.08017
0.399963	0.721041	2.32916	0.95542
1.00121	3.52833	1.01838	2.04726
1.44625	3.35232	3.39095	3.3652
1.50778	2.96452
1.36468	3.19491
0.988333	3.50686
0.819477
0.888164
1.16434

## Sheet: serumLDL－ｃ
Normal	Model	OsPs	MH
0.127806	1.21308	0.121933	0.288364
0.0368255	1.0909	0.404518	0.257158
0.077117	3.23415	0.782453	0.246756
0.0589208	2.71296	0.347308	0.205148
0.0641197	0.58011	0.368111	0.0959286
0.181095	1.0909	0.137536	0.121933
-0.0593541	1.76806	0.137536	0.024849
0.0277275	0.67499	0.130602	0.224219
0.250223	1.98734	0.251957	0.510271
0.0629892	1.11185	0.205148	0.231153
0.295298	1.83825
0.307434	1.23147
0.399317	1.83998
0.319569
0.510271
0.401051

## Sheet: serumHDL-c
Normal	Model	OsPs	MH
3.43023	2.87782	3.60353	4.95617
3.53272	2.85177	3.53703	4.39547
3.20093	3.60567	3.91033	4.267
2.78749	2.99074	3.90579	3.78489
3.2183	3.24609	3.65189	4.06599
3.89577	2.99942	3.91637	2.7602
4.15808	3.24088	3.24836	2.74509
3.39722	3.19745	3.067	3.00655
3.18356	2.60907	2.7602	4.52242
3.15924	2.50479	4.29572	4.76272
3.8784	2.7602
3.02374	2.29169
5.80313	2.72091
3.01562
3.10479
3.17431
2.59395
3.30428
3.07758
3.67003
3.73048

## Sheet: liverTC
Normal	Model	OsPs	MH
0.0546453	0.174905	0.0324559	-0.00171479
0.0535695	0.11624	0.00578496	0.0301302
0.0257455	0.141637	0.0541099	0.0339924
0.0431375	0.234102	0.0315493	0.0373404
0.0349023	0.252463	0.0376154	0.0504909
0.024716	0.250755	0.0641616	0.0480368
0.0414756	0.140006	0.0665838	0.0504018
0.0428708	0.453667	0.0710995	0.0702533
0.0738429	0.244293	0.0339978	0.0481806
0.356773	0.170242	0.0596089	0.0355326
0.163433	0.356463
0.0611851	0.112557
0.0554864	0.0240594
0.100804	0.047409
0.230763	0.0278133
0.0602251	0.135671
	0.136281

## Sheet: liverTG
Normal	Model	OsPs	MH
0.218698	0.794474	0.114942	0.0949006
0.110432	0.359403	0.0892777	0.12592
0.101038	0.388377	0.157646	0.144203
0.127207	0.908668	0.161571	0.0911774
0.0989313	0.569897	0.1405	0.114963
0.0835567	0.975372	0.124765	0.12213
0.16443	0.518818	0.147837	0.103194
0.103958	0.882964	0.183847	0.164965
0.133745	0.510111	0.148911	0.105907
0.132928	0.188232	0.257853	0.165443
0.171713	0.328836
0.168262	0.293966
0.104603	0.26448
0.133826	0.280522
0.158163	0.316971
0.148765	0.387384
	0.397774

## Sheet: liverLDL-c
Normal	Model	OsPs	MH
0.0451382	-0.0144147	0.00517302	0.0102559
0.0635373	0.0363131	0.0365141	0.0452836
0.0652914	0.0811963	0.0277285	0.0459293
0.00957197	0.0782562	0.0301513	0.0181985
0.0560205	0.0860615	0.0318425	0.0124738
0.0110555	0.105136	0.0226555	0.00662099
0.0196421	0.0628359	0.0256929	0.131792
-0.0608027	0.114115	0.0186101	-0.00752371
0.00931914	0.108059	0.0258481	0.0226441
0.00371259	0.0349759	0.00569862	0.0227097
-0.0125338	0.0211903
-0.00233756	0.00908581
0.0025292	0.00432372
0.00552047	0.0221105
-0.000339663	0.0195193
0.00552046	0.044066
	0.0205682

## Sheet: liverHDL-c
Normal	Model	OsPs	MH
0.0341144	0.0070273	0.031045	0.0133008
0.0293421	0.00991671	0.0772902	0.0133071
0.0426004	0.00933717	0.0473876	0.0160539
0.0284028	0.00986615	0.0479373	0.0144209
0.0256469	0.00734905	0.0320968	0.0186729
0.0214441	0.0136581	0.0299898	-0.00616306
0.0242639	0.00949265	0.0150771	-0.00510844
0.0223002	0.0177104	0.0104318	0.00471205
0.0310153	0.0485962	0.0278551	0.0037106
0.0311474	0.0061462	0.0177025	0.00145092
0.0169099	0.00688905
0.0238226	0.00499989
0.0168613	0.00456413
0.0224319	0.00640787
0.0185375	0.00700484
0.028155	0.00990063
	-0.624194

## Sheet: bodyweight
0wk	Normal	Normal	Model	Model	OsPs	MH			food intake	Normal	Model	OsPs	MH		energy	Normal	Model	OsPs	MH		Bodyweight increase	Normal	Model	OsPs	MH
	47.37	43.57	43.35	40.46	39.78	42.15				8.71	7.41	6.47	6.56			32.227	33.345	29.115	29.52			2.66	-1.96	0.55	-2.08
	52.86	50.94	43.7	42.65	41.81	40.38				9.27	6.97	7.23	6.89			34.299	31.365	32.535	31.005			4.17	-3.04	2.23	-0.95
	44.87	47.49	39.57	34.29	40.32	41.16				7.59	7.23	7.95	7.04			28.083	32.535	35.775	31.68			2.55	-2.78	1.49	-1.35
	49.03	47.3	45.16	42.34	41.17	42.14				8.24	6.56	7.44	7.79			30.488	29.52	33.48	35.055			2.94	-2.47	1.06	-0.84
	51.98	46.62	42.98	40.68	41.71	42.02				9.65	7.89	6.88	8.02			35.705	35.505	30.96	36.09			3.51	-3.31	1.39	-1.23
	50.24	44.7	37.14	42.08	36.97	43.4				7.97	7.94	6.97	7.53			29.489	35.73	31.365	33.885			3.45	-2.81	0.76	-0.77
	47.53	50.03	44.1	44.4	40.48	42.97
	44.06	42.86	37.23	41.92	40.18	41.97
			39.65	39.32	41.53	45.23															energy	Normal	Model	OsPs	MH
					48.17	44.26																2.66	-1.96	0.55	-2.08
																						4.17	-3.04	2.23	-0.95
																						2.55	-2.78	1.49	-1.35
																						2.94	-2.47	1.06	-0.84
																						3.51	-3.31	1.39	-1.23
																						3.45	-2.81	0.76	-0.77
2wk	Normal	Normal	Model	Model	OsPs	MH				Normal	Model	OsPs	MH			Normal	Model	OsPs	MH
	49.23	51.65	43.67	41.2	42.61	41.71				8.23	7.27	7.44	7.28			30.451	32.715	33.48	32.76
	52.23	54.59	44.2	46.03	40.8	40.12				7.69	7.48	7.27	7.49			28.453	33.66	32.715	33.705
	47.94	50.27	32.37	36.26	40.41	42.41				7.76	7.89	7.62	7.73			28.712	35.505	34.29	34.785
	48.12	53.22	47.97	42.97	42.69	42.02				8.24	6.23	6.83	6.52			30.488	28.035	30.735	29.34		FER（0-4wk）	27.713	35.055	34.02	33.075
	48.03	51.87	41.77	45.6	43.37	38.68				8.17	6.57	6.54	6.93			30.229	29.565	29.43	31.185			28.749	34.38	35.685	35.46
	44.69	52.97	40.44	43.96	36.67	42.62				8.03	6.75	6.36	6.41			29.711	30.375	28.62	28.845			29.822	32.535	36.09	36.63
	52.04	51.61	43.86	45.34	43.06	45.95																30.451	31.815	36.495	36.315
	44.07	45.92	41.87	47.6	43.78	44.72																31.783	30.96	35.37	35.775
			41.86	44.29	44.61	45.17																32.338	33.075	34.83	33.885
					48.18	46.69
																						0.0959838	-0.0559121	0.016167	-0.0628874
																						0.145049	-0.0884235	0.0624912	-0.0267908
																						0.0855073	-0.0854464	0.0412857	-0.036855
																						0.0965486	-0.0776363	0.0290451	-0.0231309
4wk	Normal	Normal	Model	Model	OsPs	MH				Normal	Model	OsPs	MH			Normal	Model	OsPs	MH			0.110436	-0.106912	0.0392988	-0.0343816
	52.42	53.91	44.63	37.91	40.7	35.72				7.49	7.79	7.56	7.35			27.713	35.055	34.02	33.075			0.106686	-0.0849584	0.0218203	-0.0227239
	58.76	55.41	43.21	42.7	40.51	32.3				7.77	7.64	7.93	7.88			28.749	34.38	35.685	35.46
	51.39	52.71	31.15	34.14	39.32	39.12				8.06	7.23	8.02	8.14			29.822	32.535	36.09	36.63
	58.63	50.94	46.61	42.92	42.61	37.67				8.23	7.07	8.11	8.07			30.451	31.815	36.495	36.315
	52.96	49.63	40.4	44.92	41.09	36.6				8.59	6.88	7.86	7.95			31.783	30.96	35.37	35.775
	60.61	49.71	39.42	42.53	33.7	36.3				8.74	7.35	7.74	7.53			32.338	33.075	34.83	33.885
	52.66	56.71	44.51	42.42	41.59	42.23
	50.36	48.41	42.39	45.95	42.6	42.52
			39.47	42.42	42.02	41.64
					44.59	39.42

[truncated: 15 more sheets: FBG, OGTT, HOMA-ISI, HOMA-IRI, HOMA-β, IL-6, IL-10, faecesSCFA, Intestinal contents SCFA, phylum, genus, pheatmap, r, microbiota-scfa, Immunohistochemistry]
